# Supplementary material for: Hantavirus Reservoirs: Current Status with an Emphasis on Data from Brazil
Source: PubMed Central journal article supplement (PMC4036540; doi:10.3390/v6051929), 2014-04-29
Supplement: viruses-06-01929-s001.pdf [file viruses-06-01929-s001.pdf]

**Supplementary Table 1.** Geographical distribution of hantaviruses associated with rodent reservoirs in the Old World.

| Hantavirus                                                                           | Human disease | Reservoirs<br>(common name)                                               | Known virus range                                                                                                                        | Genbank accession number of complete sequence |          |          | First references to known hosts |
|--------------------------------------------------------------------------------------|---------------|---------------------------------------------------------------------------|------------------------------------------------------------------------------------------------------------------------------------------|-----------------------------------------------|----------|----------|---------------------------------|
|                                                                                      |               |                                                                           |                                                                                                                                          | S                                             | M        | L        |                                 |
| <b>Hantaviruses associated with rodents of the family Muridae, subfamily Murinae</b> |               |                                                                           |                                                                                                                                          |                                               |          |          |                                 |
| Hantaan *<br>(HTNV)                                                                  | HFRS          | <i>Apodemus agrarius</i><br>(Striped field mouse)                         | China; Korea; Japan; Russia                                                                                                              | D25533                                        | L08753   | NC005222 | [1]                             |
| Thailand *<br>(THAIV)                                                                | ND            | <i>Bandicota indica</i><br>(Great bandicoot rat)                          | Thailand                                                                                                                                 | AM397664                                      | L08756   | -        | [274]                           |
| Seoul *<br>(SEOV)                                                                    | HFRS          | <i>Rattus rattus</i> (Black rat);<br><i>Rattus norvegicus</i> (Brown rat) | Belgium; Brazil; China; France;<br>Ireland; Korea; Cambodia;<br>Laos; Portugal; Russia;<br>Singapore; Taiwan; United Kingdom;<br>Vietnam | AF187082                                      | AF18708  | AF285266 | [275]                           |
| Gou<br>(GOUV)                                                                        | ND            | <i>Rattus rattus</i><br>(Black rat)                                       | China                                                                                                                                    | AF184988                                      | AF145977 | -        | [276]                           |
| Da Bie Shan<br>(DBSV)                                                                | ND            | <i>Niviventer confucianus</i><br>(Chinese white-bellied rat)              | China                                                                                                                                    | AB027523                                      | AB027115 | DQ989237 | [276]                           |
| Serang<br>(SERV)                                                                     | ND            | <i>Rattus tanezumi</i><br>(Asian house rat)                               | Indonesia; China                                                                                                                         | -                                             | -        | -        | [134]                           |
| Saaremaa *<br>(SAAV)                                                                 | HFRS          | <i>Apodemus agrarius</i><br>(Striped field mouse)                         | Estonia; Finland; Germany;<br>Hungary; Lithuania; Russia;<br>Slovakia; Slovenia                                                          | AJ616854                                      | -        | AJ410618 | [277]                           |
| Kurkino<br>(KURV)                                                                    | HFRS          | <i>Apodemus agrarius</i><br>(Striped field mouse)                         | Estonia (mainland); Germany;<br>Slovakia; Russia; Hungary;<br>Slovenia; Croatia;                                                         | -                                             | -        | -        | [278]                           |
| Sochi<br>(SOCV)                                                                      | HFRS          | <i>Apodemus ponticus</i><br>(Black Sea field mouse)                       | Russia                                                                                                                                   | JF920150                                      | JF920149 | JF920148 | [279]                           |
| Dobrava-<br>Belgrade *<br>(DOBV)                                                     | HFRS          | <i>Apodemus flavicollis</i><br>(Yellow-necked mouse)                      | Bulgaria; Croatia; Greece<br>Hungary; Serbia and Montenegro;<br>Slovakia; Slovenia                                                       | L41916                                        | L33685   | GU904045 | [5]                             |
| Amur/<br>Soochong<br>(ASV)                                                           | HFRS          | <i>Apodemus peninsulae</i><br>(Korean field mouse)                        | China; Korea; Russia                                                                                                                     | AB071184                                      | AB127994 | AB620030 | [280]                           |
| Sangassou *<br>(SANGV)                                                               | ND            | <i>Hylomyscus simus</i><br>(African wood mouse)                           | Africa                                                                                                                                   | JQ082303                                      | JQ082301 | JQ082302 | [281]                           |
| Tigray<br>(TIGV)                                                                     | ND            | <i>Stenocephalemys albipes</i><br>(White-footed mouse)                    | Ethiopia                                                                                                                                 | -                                             | -        | -        | [282]                           |

Supplementary Table 1. *Cont.*

| Hantavirus                                                                                  | Human disease | Reservoirs (common name)                           | Known virus range                                                                                                                                                                                                                             | Genbank accession number of complete sequence |          |           | First references to known hosts |
|---------------------------------------------------------------------------------------------|---------------|----------------------------------------------------|-----------------------------------------------------------------------------------------------------------------------------------------------------------------------------------------------------------------------------------------------|-----------------------------------------------|----------|-----------|---------------------------------|
|                                                                                             |               |                                                    |                                                                                                                                                                                                                                               | S                                             | M        | L         |                                 |
| <b>Hantaviruses associated with rodents of the family Cricetidae, subfamily Arvicolinae</b> |               |                                                    |                                                                                                                                                                                                                                               |                                               |          |           |                                 |
| Puumala * (PUUV)                                                                            | HFRS (NE)     | <i>Myodes glareolus</i> (Bank vole)                | Austria; Belgium; Bosnia and Herzegovina; Bulgaria; Czech Republic; Denmark; Estonia; Finland; France; Germany; Hungary; Ireland; Lithuania; Luxembourg; The Netherlands; Norway; Poland; Romania; Russia; Slovakia; Slovenia; Sweden; Turkey | NC_00522                                      | NC_00522 | M63194    | [3]                             |
| Hokkaido (HOKV)                                                                             | ND            | <i>Myodes rufocanus</i> (Grey-sided vole)          | Japan                                                                                                                                                                                                                                         | AB675480                                      | AB675451 | AB712372  | [283]                           |
| Muju (MUJV)                                                                                 | ND            | <i>Myodes regulus</i> (Royal vole)                 | Korea                                                                                                                                                                                                                                         | DQ138142                                      | EF198413 | -         | [24]                            |
| Tula * (TULV)                                                                               | -             | <i>Microtus arvalis</i> (European common vole)     | Austria; Belgium; Croatia; Czech Republic; Finland; France; Germany; Hungary; Lithuania; The Netherlands; Poland; Russia; Serbia; Slovenia; Slovakia                                                                                          | Z49915                                        | Z66538   | NC_005226 | [138]                           |
| Topografov * (TOPV)                                                                         | ND            | <i>Lemmus sibiricus</i> (Siberian brown lemming)   | Palaeartic tundra                                                                                                                                                                                                                             | AJ01164                                       | AJ011647 | AJ011649  | [284]                           |
| Khabarovsk (KHAV)                                                                           | ND            | <i>Microtus maximowiczii</i> (Maximowicz's vole)   | China;Russia                                                                                                                                                                                                                                  | U35255                                        | AJ011648 | -         | [151]                           |
| Vladivostok (VLAV)                                                                          | ND            | <i>Microtus fortis</i> (Reed vole)                 | China;Russia                                                                                                                                                                                                                                  | -                                             | -        | -         | [285]                           |
| Yuanjiang (YUJV)                                                                            | ND            | <i>Microtus fortis</i> (Reed vole)                 | China                                                                                                                                                                                                                                         | FJ170795                                      | -        | -         | [286]                           |
| Luxi (LUXV)                                                                                 | HFRS          | <i>Eothenomys miletus</i> (Yunnan red-backed vole) | China                                                                                                                                                                                                                                         | -                                             | -        | -         | [287]                           |
| Tatenale (TATV)                                                                             | ND            | <i>Microtus agrestis</i> (Grey-brown vole)         | United Kingdom                                                                                                                                                                                                                                | -                                             | -        | -         | [288]                           |

HFRS: Haemorrhagic Fever with Renal Syndrome; ND: none documented; NE: epidemic nephropathy; \* Officially recognised as viral species by the ICTV; – Not available in GenBank.

**Supplementary Table 2.** Geographical distribution of hantaviruses associated with rodent reservoirs in the New World.

| Hantavirus                                                                                    | Human disease | Reservoirs<br>(common name)                                       | Known virus range                                                  | Genbank accession number of complete sequences |                         |                       | First reference to known hosts |
|-----------------------------------------------------------------------------------------------|---------------|-------------------------------------------------------------------|--------------------------------------------------------------------|------------------------------------------------|-------------------------|-----------------------|--------------------------------|
|                                                                                               |               |                                                                   |                                                                    | S                                              | M                       | L                     |                                |
| <b>Hantaviruses associated with rodents of the family Cricetidae, subfamily Sigmodontinae</b> |               |                                                                   |                                                                    |                                                |                         |                       |                                |
| Anajatuba (ANAJV)                                                                             | HPS           | <i>Oligoryzomys fornesi</i><br>(Fornes' colilargo)                | Northern Brazil                                                    | -                                              | -                       | -                     | [171]                          |
| Andes (ANDV) *                                                                                | HPS           | <i>Oligoryzomys longicaudatus</i><br>(Long-tailed pygmy rice rat) | Southwestern Argentina and Chile                                   | AF324902 <sup>b</sup>                          | AF324901 <sup>b</sup>   | AF291704 <sup>b</sup> | [169]                          |
| Alto Paraguay (ALPV)                                                                          | ND            | <i>Holochilus chacarius</i><br>(Chacoan marsh rat)                | Western Paraguay                                                   | DQ345762                                       | -                       | -                     | [175]                          |
| Ape Aime-Itapua (AAIV) <sup>a</sup>                                                           | ND            | <i>Akodon montensis</i><br>(Montane akodont)                      | Eastern Paraguay                                                   | -                                              | -                       | -                     | [175]                          |
| Araraquara (ARAV)                                                                             | HPS           | <i>Necomys lasiurus</i><br>(Hairy-tailed bolo mouse)              | Eastern Brazil                                                     | EF571895 <sup>b</sup>                          | -                       | -                     | [200]                          |
| Bayou (BAYV) *                                                                                | HPS           | <i>Oryzomys palustris</i><br>(Marsh rice rat)                     | Southeastern USA                                                   | GQ200820                                       | GQ244521                | GQ244526              | [289]                          |
| Bermejo (BERV)                                                                                | ND            | <i>Oligoryzomys chacoensis</i><br>(Chacoan pygmy rice rat)        | Northwestern Argentina                                             | AF482713                                       | -                       | -                     | [169]                          |
| Black Creek Canal (BCCV) *                                                                    | HPS           | <i>Sigmodon hispidus</i><br>(Hispid cotton rat)                   | Southern Florida, USA; Venezuela; Peru                             | L39949                                         | L39950                  | -                     | [290]                          |
| Calabazo (CALV)                                                                               | ND            | <i>Zygodontomys brevicauda</i><br>(Short-tailed cane mouse)       | central-western Panamá; Northwestern Colombia                      | -                                              | -                       | -                     | [291]                          |
| Caño Delgadito (CADV) *                                                                       | ND            | <i>Sigmodon alstoni</i><br>(Alston's cotton rat)                  | Western Venezuela                                                  | DQ285566                                       | DQ284451                | GQ200821              | [292]                          |
| Castelo dos Sonhos (CASV)                                                                     | HPS           | <i>Oligoryzomys utiaritensis</i><br>(No comom name)               | Central-western Brazil                                             | JX443691                                       | -                       | -                     | [201]                          |
| Catacamas (CATV)                                                                              | ND            | <i>Oryzomys couesi</i><br>(Coues' rice rat)                       | Eastern Honduras                                                   | DQ256126                                       | DQ177347                | FJ858378              | [293]                          |
| Central Plata                                                                                 | HPS           | <i>Oligoryzomys flavescens</i><br>(Yellow pygmy rice rat)         | Southern Uruguay                                                   | -                                              | -                       | -                     | [192]                          |
| Choclo (CHOV)                                                                                 | HPS           | <i>Oligoryzomys fulvescens</i><br>(Fulvous pygmy rice rat)        | Central-western Panama                                             | DQ285046                                       | DQ285047                | EF397003              | [290]                          |
| Itapua (ITAV)                                                                                 | ND            | <i>Oligoryzomys nigripes</i><br>(Black-footed pygmy rice rat)     | Eastern Paraguay                                                   | DQ345765                                       | -                       | -                     | [175]                          |
| Jabora (JABV)                                                                                 | ND            | <i>Akodon montensis</i><br>(Montane akodont)                      | Southern Brazil; Eastern Paraguay                                  | JN232078                                       | -                       | -                     | [177]                          |
| Juquitiba (JUQV)                                                                              | HPS           | <i>Oligoryzomys nigripes</i><br>(Black-footed pygmy rice rat)     | Southern Brazil; Eastern Paraguay; Northeastern Argentina; Uruguay | KC422344                                       | FJ409556 <sup>b,c</sup> | -                     | [200]                          |

Supplementary Table 2. Cont.

| Hantavirus            | Human disease | Reservoirs (common name)                                          | Known virus range                                  | Genbank accession number of complete sequences |          |          | First reference to known hosts |
|-----------------------|---------------|-------------------------------------------------------------------|----------------------------------------------------|------------------------------------------------|----------|----------|--------------------------------|
|                       |               |                                                                   |                                                    | S                                              | M        | L        |                                |
| Laguna Negra (LANV) * | HPS           | <i>Calomys laucha</i><br>(Small vesper mouse)                     | Western Paraguay                                   | AF005727                                       | AF005728 | -        | [173]                          |
|                       |               | <i>Calomys callosus</i><br>(Large vesper mouse)                   | Bolivia; Northwestern Argentina                    | -                                              | -        | -        | [179]                          |
|                       |               | <i>Callomys callidus</i><br>(Crafty vesper mouse)                 | Midwest Brazil                                     | -                                              | -        | -        | [174]                          |
| Lechiguanas (LECV)    | HPS           | <i>Oligoryzomys flavescens</i><br>(Yellow pygmy rice rat)         | Central Argentina                                  | AF482714                                       | AF028022 | -        | [294]                          |
| Maciel (MACV)         | ND            | <i>Necromys obscurus</i><br>(Dark bolo mouse)                     | Central Argentina                                  | AF482716                                       | -        | -        | [294]                          |
| Maporal (MAPV)        | ND            | <i>Oligoryzomys delicatus</i><br>(Delicate pygmy rice rat)        | Western Venezuela                                  | AY267347                                       | AY363179 | EU788002 | [295]                          |
| Muleshoe (MULV) *     | ND            | <i>Sigmodon hispidus</i><br>(Hispid cotton rat)                   | Texas to Southern Nebraska, USA                    | U54575                                         | -        | -        | [296]                          |
| Oran (ORNV)           | HPS           | <i>Oligoryzomys longicaudatus</i><br>(Long-tailed pygmy rice rat) | Northwestern Argentina                             | AF482715                                       | AF028024 | -        | [169]                          |
| Pergamino (PERV)      | ND            | <i>Akodon azarae</i><br>(Grass field mouse)                       | Central Argentina                                  | AF482717                                       | -        | -        | [293]                          |
| Playa de Oro (OROV)   | ND            | <i>Oryzomys couesi</i><br>(Coues' rice rat)                       | Colima, Western México                             | EF534079                                       | -        | -        | [297]                          |
| Rio Mamore (RIOMV)*   | HPS           | <i>Oligoryzomys microtis</i><br>(Small-eared pygmy rice rat)      | Bolivia; Northeastern Peru;<br>Northwestern Brazil | U52136                                         | FJ608550 | FJ809772 | [298]                          |
| Rio Mearim (RIMEV)    | ND            | <i>Holochilus sciureus</i><br>(Marsh rat)                         | Northeastern Brazil                                | -                                              | -        | -        | [171]                          |

Supplementary Table 2. Cont.

| Hantavirus                                                                                  | Human disease | Reservoirs (common name)                                           | Known virus range         | Genbank accession number of complete sequences |          |          | First reference to known hosts |
|---------------------------------------------------------------------------------------------|---------------|--------------------------------------------------------------------|---------------------------|------------------------------------------------|----------|----------|--------------------------------|
|                                                                                             |               |                                                                    |                           | S                                              | M        | L        |                                |
| <b>Hantaviruses associated with rodents of the family Cricetidae, subfamily Neotominae</b>  |               |                                                                    |                           |                                                |          |          |                                |
| Sin Nombre (SNV)<br>*                                                                       | HPS           | <i>Peromyscus maniculatus</i><br>(Deer mouse)                      | North USA; Canada; Mexico | L37904                                         | L37903   | L37901   | [9]                            |
| Blue River (BLUV)                                                                           | ND            | <i>Peromyscus leucopus</i><br>(White-footed mouse)                 | Central USA               | -                                              | AF030551 | -        | [42]                           |
| New York (NYV)<br>*                                                                         | HPS           | <i>Peromyscus leucopus</i><br>(White-footed mouse)                 | East and central USA      | U09488 <sup>b</sup>                            | U36802   | -        | [165]                          |
| El Moro Canyon (ELMCV)<br>*                                                                 | ND            | <i>Reithrodontomys megalotis</i><br>(Western harvest mouse)        | Western USA;<br>México    | U11427                                         | U26828   | -        | [299]                          |
| Rio Segundo (RIOSV)<br>*                                                                    | ND            | <i>Reithrodontomys mexicanus</i><br>(Mexican harvest mouse)        | Costa Rica                | U18100                                         | -        | -        | [300]                          |
| Limestone canyon (LSCV)                                                                     | ND            | <i>Peromyscus boylii</i><br>(Brush mouse)                          | Southwestern USA          | -                                              | -        | -        | [181]                          |
| Monongahela (MGLV)                                                                          | HPS           | <i>Peromyscus maniculatus</i><br>(Deer Mouse)                      | Eastern USA; Canada       | U32591                                         | -        | -        | [166]                          |
| Montano (MTNV)                                                                              | ND            | <i>Peromyscus beatae</i><br>(Orizaba deer mouse)                   | México                    | AB620100                                       | AB620101 | AB620102 | [167]                          |
| Carrizal (CARV)                                                                             | ND            | <i>Reithrodontomys sumichrasti</i><br>(Sumichrast's harvest mouse) | México                    | AB620103                                       | AB620104 | AB620105 | [167]                          |
| Huitzilac (HUIV)                                                                            | ND            | <i>Reithrodontomys megalotis</i><br>(Western harvest mouse)        | México                    | AB620106                                       | AB620107 | AB620108 | [167]                          |
| <b>Hantaviruses associated with rodents of the family Cricetidae, subfamily Arvicolinae</b> |               |                                                                    |                           |                                                |          |          |                                |
| Prospect Hill (PHV)                                                                         | ND            | <i>Microtus pennsylvanicus</i><br>(Meadow vole)                    | USA; Canada               | U47136                                         | X55129   | EF646763 | [6]                            |
| Bloodland Lake (BLLV)                                                                       | ND            | <i>Microtus ochrogaster</i><br>(Prairie vole)                      | USA                       | U19303                                         | -        | -        | [301]                          |
| Isla Vista (ISLAV)                                                                          | ND            | <i>Microtus californicus</i><br>(California vole)                  | USA                       | IVU31534                                       | -        | -        | [302]                          |

HPS: Hantavirus Pulmonary Syndrome; ND: none documented; \* Officially recognised as viral species by the ICTV; – Not available in GenBank; <sup>a</sup>The AAVV genotype was a reassortment of the S-segment of the JABV-like viral genotypes and the M-segment of the AND-like viral genotypes [186]. <sup>b</sup> Sequence from human case. <sup>c</sup> Sequence of Araucaria virus, a variant of JUQV. \*\* *Oligoryzomys longicaudatus* distribution does not include the Northwestern Argentina where the hantavirus Oran was identified in *Oligoryzomys* specimens. *Oligoryzomys brendae* is the only large-sized species of *Oligoryzomys* inhabiting the northwestern Argentina [303], and, probably, this species is the reservoir of hantavirus Oran according to this new taxonomic arrangement or *O. chacoensis* as recently described by Rivera and colleagues [188].

**Supplementary Table 3.** Geographical distribution of hantaviruses associated with insectivorous reservoirs and chiropterans in the Old and New World.

| Hantavirus                                                                                  | Reservoirs<br>(common name)                                 | Known virus range                                                                                                      | Genbank accession number of complete sequences |          |          | First references to<br>known hosts |
|---------------------------------------------------------------------------------------------|-------------------------------------------------------------|------------------------------------------------------------------------------------------------------------------------|------------------------------------------------|----------|----------|------------------------------------|
|                                                                                             |                                                             |                                                                                                                        | S                                              | M        | L        |                                    |
| <b>Hantaviruses associated with shrews and moles of the families Soricidae and Talpidae</b> |                                                             |                                                                                                                        |                                                |          |          |                                    |
| Thottapalayam (TPMV) *                                                                      | <i>Suncus murinus</i><br>(Asian house shrew)                | India; China; Nepal                                                                                                    | AY526097                                       | DQ825771 | DQ825770 | [20]                               |
| Imjin (MJNV)                                                                                | <i>Crocidura lasiura</i><br>(Ussuri white-toothed<br>Shrew) | South Korea                                                                                                            | EF641804                                       | EF641797 | EF641806 | [221]                              |
| Nova (NVAV)                                                                                 | <i>Talpa europaea</i><br>(European common mole)             | South-western Hungary;<br>France                                                                                       | FJ539168                                       | -        | FJ593498 | [212]                              |
| Asama (ASAV)                                                                                | <i>Urotrichus talpoides</i><br>(Japanese shrew mole)        | Japan                                                                                                                  | EU929070                                       | EU929073 | EU929076 | [26]                               |
| Seewis (SWSV)                                                                               | <i>Sorex araneus</i><br>(Eurasian common shrew)             | European Russia; Siberia;<br>Belgium; Yugoslavia;<br>Hungary; Finland Austria;<br>Czech Republic; Slovakia;<br>Germany | EF636024                                       | -        | -        | [23]                               |
| Oxbow (OXBV)                                                                                | <i>Neurotrichus gibbsii</i><br>(American shrew mole)        | Oregon, USA                                                                                                            | FJ539166                                       | FJ539167 | -        | [27]                               |
| Cao Bang (CBNV)                                                                             | <i>Anourosorex squamipes</i><br>(Chinese shrew mole)        | Vietnam                                                                                                                | EF543524                                       | EF543526 | EF543525 | [24]                               |
| Camp Ripley (RPLV)                                                                          | <i>Blarina brevicauda</i><br>(Short-tailed shrew)           | Minnesota, USA                                                                                                         | -                                              | -        | -        | [25]                               |
| Tanganya (TGNV)                                                                             | <i>Crocidura theresae</i><br>(Therese's shrew)              | Guinea                                                                                                                 | -                                              | -        | -        | [22]                               |
| Jemez Springs (JMSV)                                                                        | <i>Sorex monticolus</i><br>(dusky shrew)                    | New Mexico; Colorado,<br>USA                                                                                           | FJ686859                                       | -        | -        | [222]                              |
| Ash River (ARRV)                                                                            | <i>Sorex cinereus</i><br>(masked shrew)                     | Minnesota, USA                                                                                                         | -                                              | -        | -        | [222]                              |
| Kenkeme (KKMV)                                                                              | <i>Sorex roboratus</i><br>(flat-skulled shrew)              | Sakha Republic in Eastern<br>Siberia                                                                                   | GQ306148                                       | -        | -        | [28]                               |
| Rockport (RKPV)                                                                             | <i>Scalopus aquaticus</i><br>(Eastern mole)                 | Texas, USA                                                                                                             | HM015218                                       | HM015219 | HM015220 | [29]                               |
| Asikkala (ASIV)                                                                             | <i>Sorex minutus</i><br>(Eurasian pygmy shrew)              | Czech Republic; Germany;<br>Finland                                                                                    | KC880342                                       | KC880345 | -        | [304]                              |
| Azagny (AZGV)                                                                               | <i>Crocidura obscurior</i><br>(West African pygmy<br>shrew) | Coast of Côte d'Ivoire                                                                                                 | -                                              | -        | -        | [305]                              |

Supplementary Table 3. *Cont.*

| Hantavirus                                                                                              | Reservoirs<br>(common name)                                                                                                                                                       | Known virus range                       | Genbank accession number of complete sequences |          |          | First references to<br>known hosts |
|---------------------------------------------------------------------------------------------------------|-----------------------------------------------------------------------------------------------------------------------------------------------------------------------------------|-----------------------------------------|------------------------------------------------|----------|----------|------------------------------------|
|                                                                                                         |                                                                                                                                                                                   |                                         | S                                              | M        | L        |                                    |
| Laihia (LAIV)                                                                                           | <i>Neomys fodiens</i><br>(water shrew)                                                                                                                                            | Finland                                 | -                                              | -        | -        | [81]                               |
| Jeju (JEJV)                                                                                             | <i>Crocidura shantungensis</i><br>(Asian lesser white-toothed shrews)                                                                                                             | Jeju Island Southern coast of<br>Korea  | HQ834695                                       | HQ834696 | HQ834697 | [225]                              |
| Boginia (BOGV)                                                                                          | <i>Neomys fodiens</i><br>(Eurasian water shrew)                                                                                                                                   | Central Poland                          | -                                              | -        | -        | [306]                              |
| Yakeshi (YKSV)                                                                                          | <i>Sorex isodon</i><br>(Taiga shrew)                                                                                                                                              | Eastern China                           | JX465423                                       | JX465403 | -        | [226]                              |
| Lianghe (LHEV)                                                                                          | <i>Anourosorex squamipes</i><br>(Chinese mole shrew)                                                                                                                              | Southwest China                         | JX465406                                       | JX465390 | -        | [226]                              |
| Bowé (BOWV)                                                                                             | <i>Crocidura douceti</i><br>(Doucet's musk shrew)                                                                                                                                 | Southwestern Guinea                     | KC631782                                       | KC631783 | KC631784 | [306]                              |
| <b>Hantaviruses associated with bats of the families Vespertilionidae, Nycteridae and Rhinolophidae</b> |                                                                                                                                                                                   |                                         |                                                |          |          |                                    |
| Mouyassue (MOUV)                                                                                        | <i>Neoromicia nanus</i><br>(banana pipistrelles)                                                                                                                                  | Southeastern<br>region of Côte d'Ivoire | -                                              | -        | -        | [30]                               |
| Magboi (MGBV)                                                                                           | <i>Nycteris hispida</i><br>(hairy slit-faced)                                                                                                                                     | Sierra<br>Leone, África                 | -                                              | -        | -        | [31]                               |
| Xuan Son (XSV)                                                                                          | <i>Hipposideros pomona</i><br>(Pomona roundleaf)                                                                                                                                  | Vietnam                                 | -                                              | -        | -        | [227]                              |
| Huangpi (HUPV)                                                                                          | <i>Pipistrellus abramus</i><br>(japanese house or japanese<br>pipistrelle)                                                                                                        | China                                   | JX473273                                       | -        | -        | [226]                              |
| Longquan (LQUV)                                                                                         | <i>Rhinolophus affinis</i><br>(Intermediate Horseshoe)<br><i>Rhinolophus sinicus</i><br>(Chinese Rufous Horseshoe)<br><i>Rhinolophus monoceros</i><br>(Formosan Lesser Horseshoe) | China                                   | JX465413                                       | JX465398 | -        | [226]                              |

\* Officially recognised as viral species by the ICTV; – Not available in GenBank.
